# Supplementary material for: Mechanical, morphological and comparative properties of microbeads assembled from carboxylated cellulose nanocrystals
Source: Royal Society of Chemistry journal article supplement (doi:10.1039/d3ta05298b), 2023-11-16
Supplement: d3ta05298b1.pdf [file d3ta05298b1.pdf]

## Electronic Supplementary Information

### Measuring Young's Modulus of Carboxylated Cellulose Nanocrystal Microbeads *via* Atomic Force Microscopy

Junqi Wu,<sup>a</sup> and Mark P. Andrews<sup>\*a</sup>

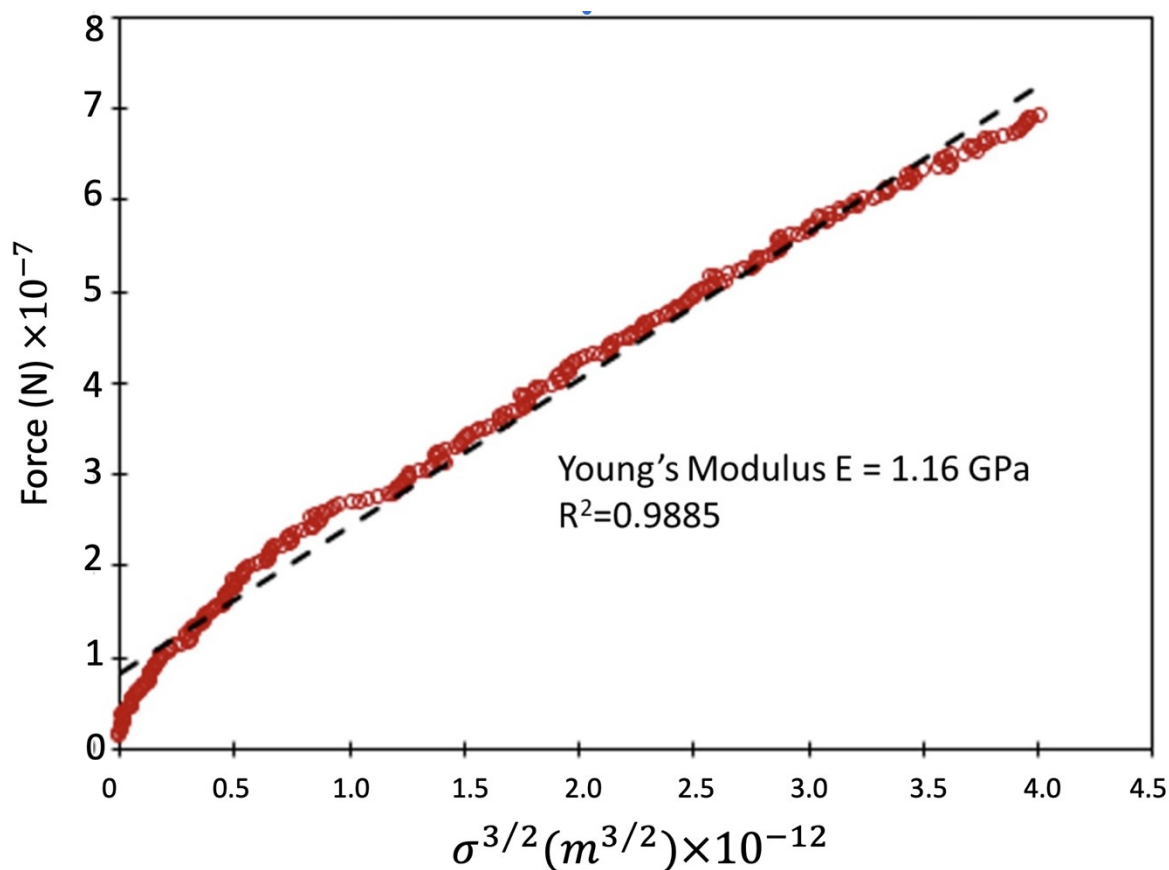

**Figure ES1** Young's Modulus E of polystyrene microbeads based on a linear fit to the indentation depth expressed as  $\delta^{3/2}$  for Hertz model.

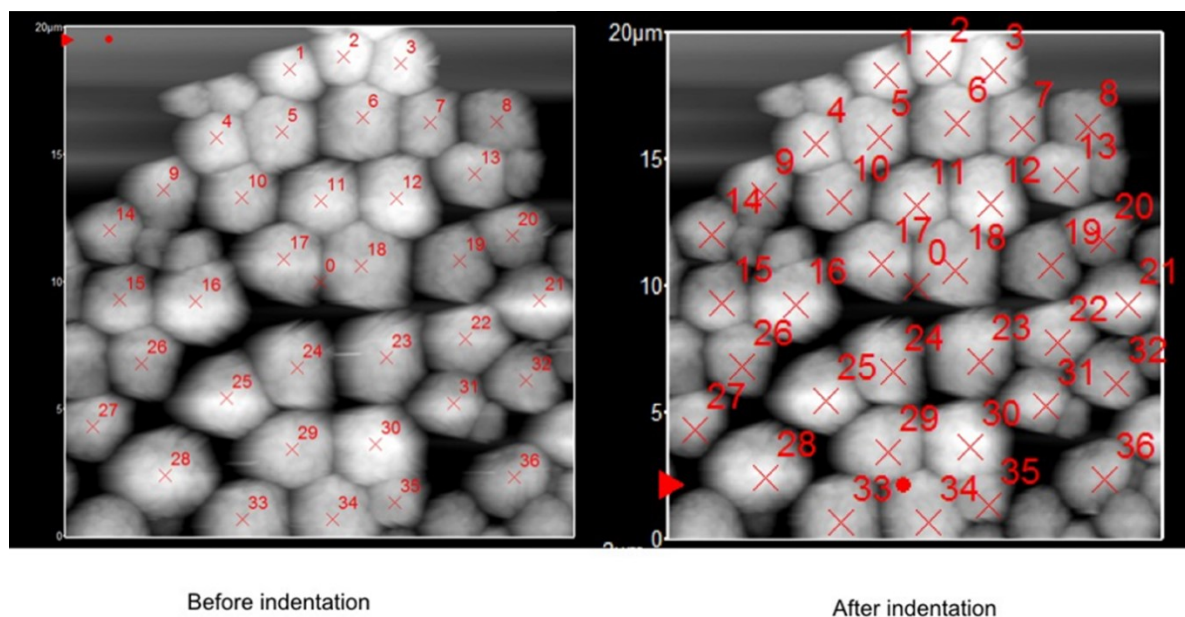

**Figure ES2** cCNC microbead AFM topographic images before and after indentation.

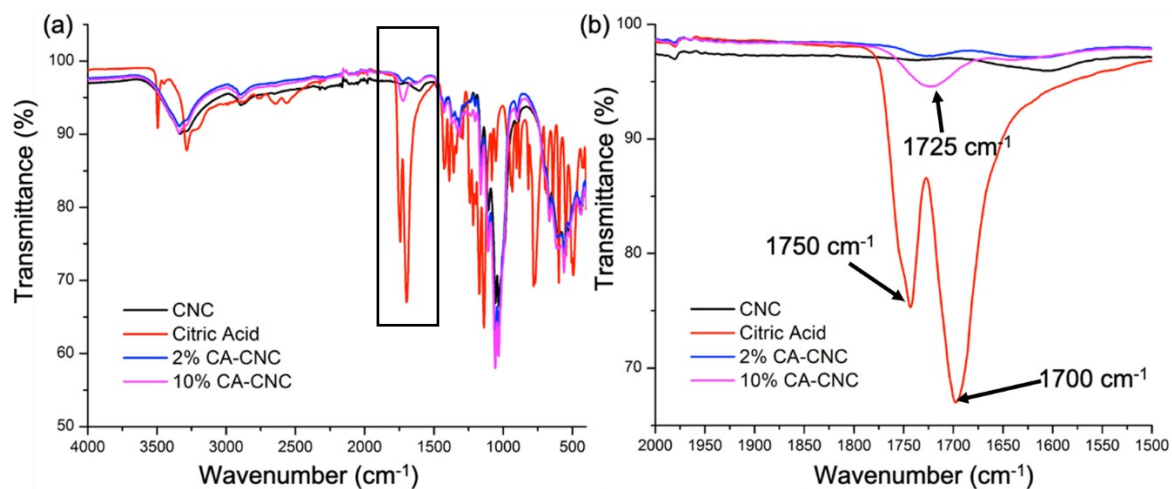

**Figure ES3** ATR FT-IR spectra comparing cCNC microbeads, citric acid, 2% and 10% citric acid cCNC microbeads. (a) Overlapped full spectra of microbeads of cCNC, citric acid (CA) powder, and CA-cCNC microbeads. (b) Boxed region of spectrum (a) expanded. Region centered at  $1725\text{ cm}^{-1}$  is the result of esterification of CA with cCNC. This region contains overlaps of  $\nu$  (C=O) from unreacted carboxylic acid and ester. C=O stretching vibrations from neat citric acid powder are centred at  $1700$  and  $1750\text{ cm}^{-1}$ .

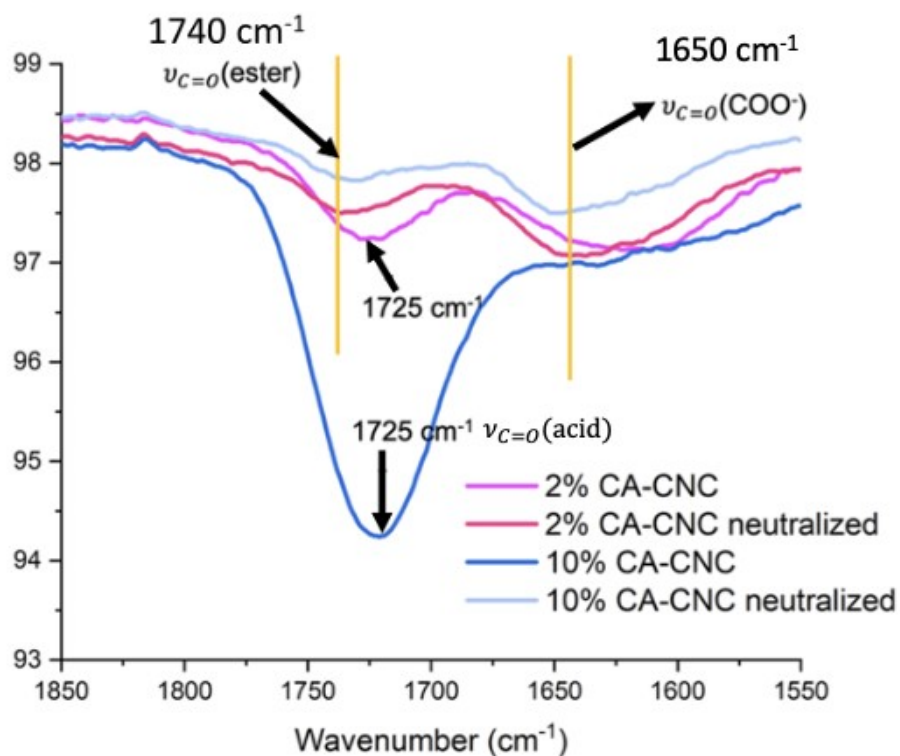

**Figure ES4** ATR FT-IR spectra showing the ester bond carbonyl ( $\sim 1740 \text{ cm}^{-1}$ ) for 2% and 10% CA-cCNC microbeads after immersing the microbeads in dilute aqueous base (pH=8) to shift carboxylic acid  $\nu_{\text{C}=\text{O}}$  stretch from  $\sim 1700 \text{ cm}^{-1}$  to sodium carboxylate at  $\sim 1650 \text{ cm}^{-1}$ .

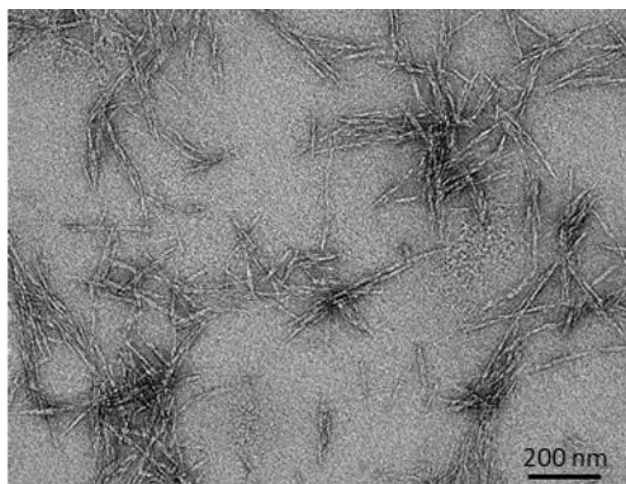

**Figure ES5** TEM image of cCNC nanorods.
